# Supplementary material for: Serum metabolomics of Indian women with polycystic ovary syndrome using 1H NMR coupled with a pattern recognition approach
Source: Royal Society of Chemistry journal article supplement (doi:10.1039/c6mb00420b), 2016-09-01
Supplement: c6mb00420b1.pdf [file c6mb00420b1.pdf]

### Supplementary material

supplementary Fig 1

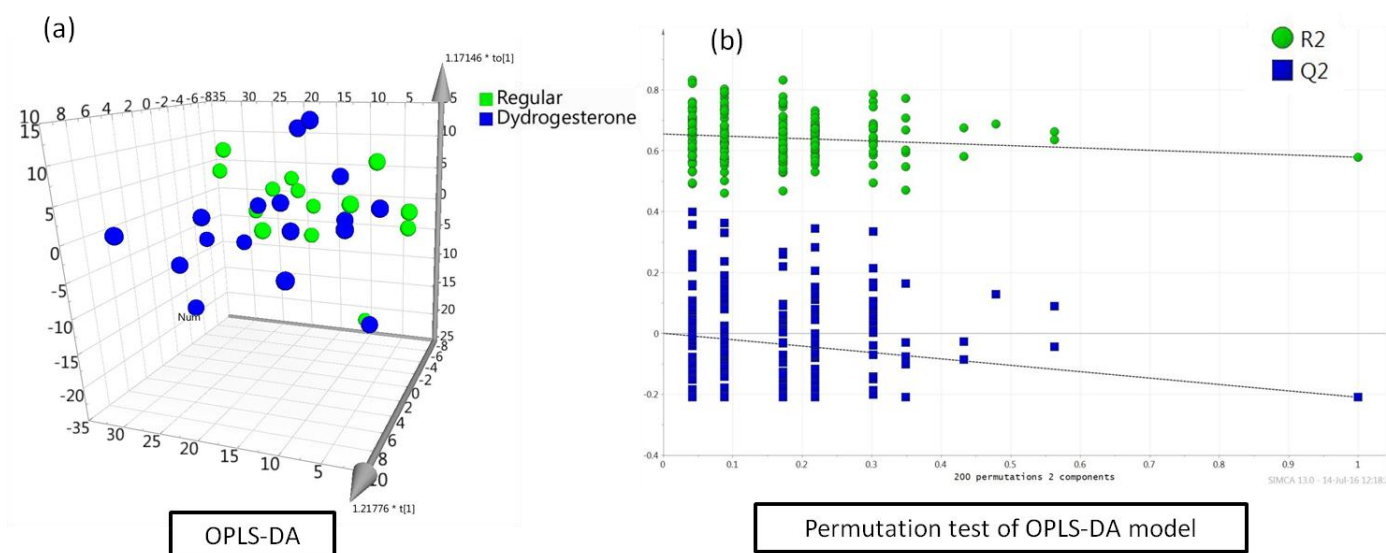

**Supplementary fig1:** Score scatter plot of (a) OPLS-DA showing mixed patterns and no clear discrimination between PCOS women with regular menstrual cycle (green) and dydrogesterone administered PCOS patients (blue) (b) The statistical significance of the OPLS-DA model is checked using permutation test ( $n = 200$ ). The R2 and Q2 values of the obtained true model are on the extreme right-hand side of the plot. The R2 and Q2 values of the original model in the validation test exhibited low values than those of the randomly permuted models

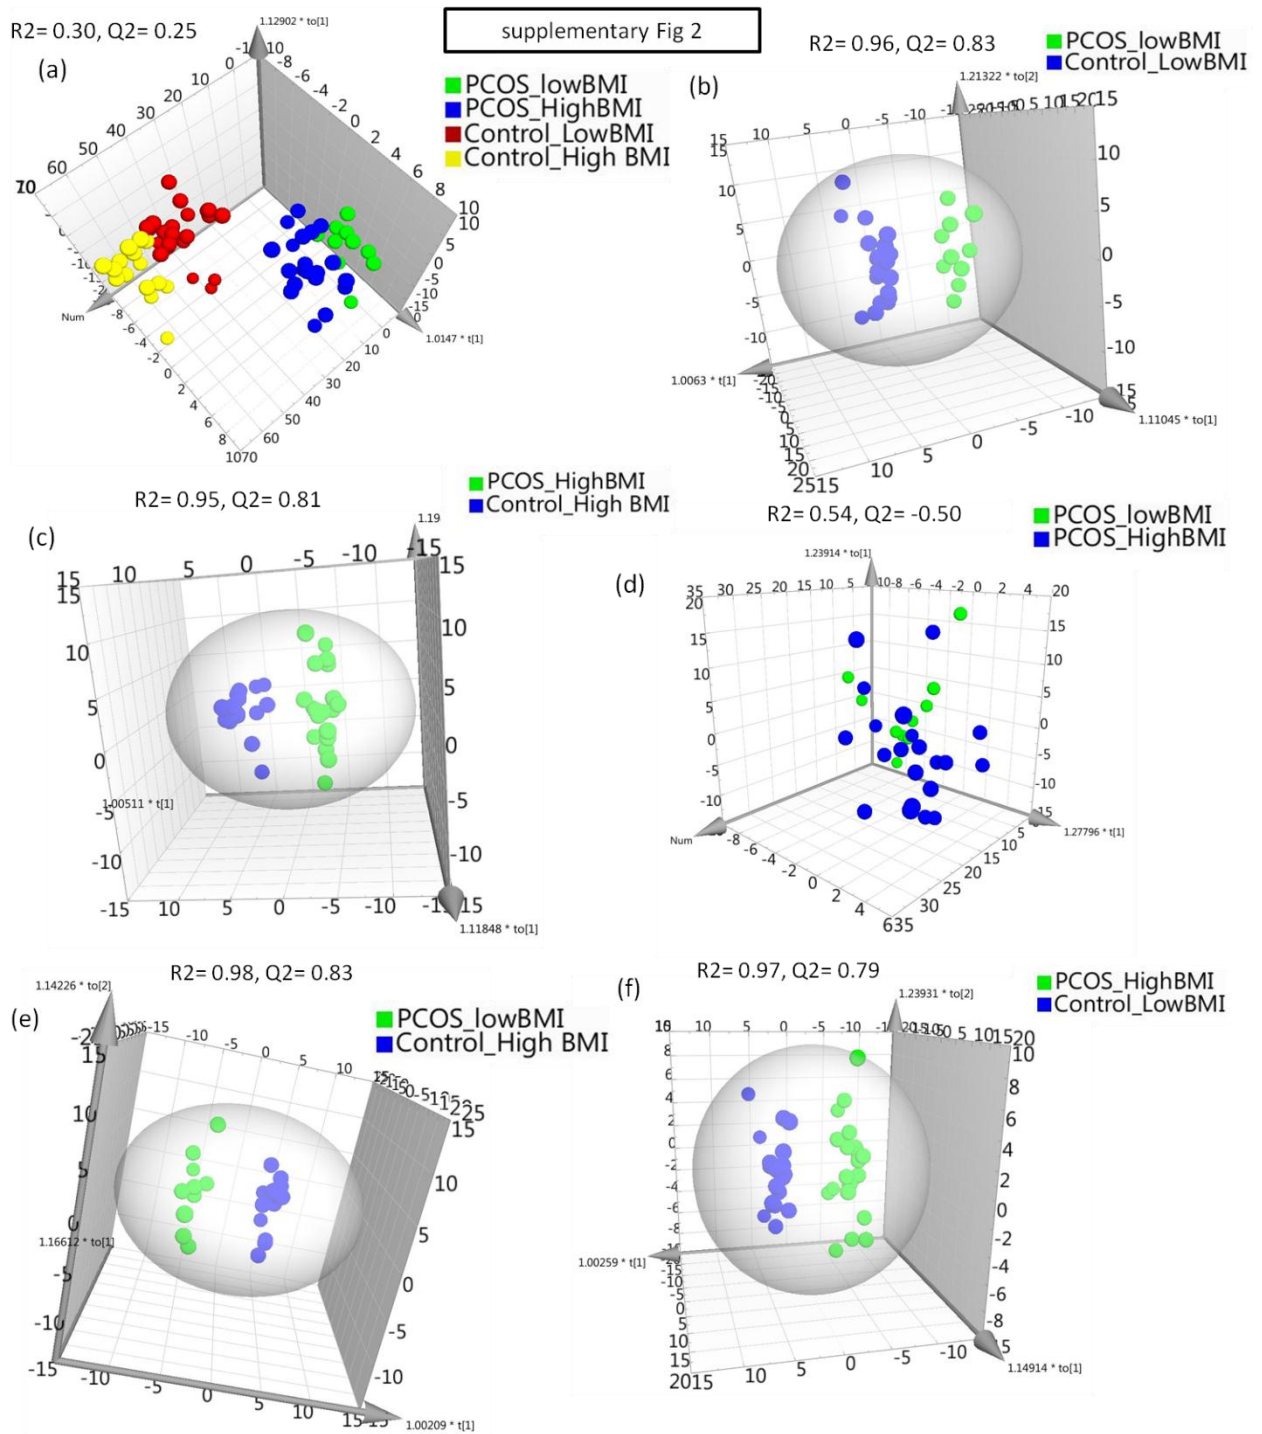

**Supplementary fig2:** Score scatter plots of OPLS-DA for (a) low BMI PCOS (green), high BMI PCOS (blue), low BMI Controls (red) and high BMI Controls (yellow); (b) low BMI PCOS (green) vs low BMI Controls (blue); (c) high BMI PCOS (green) vs high BMI Controls (blue); (d) low BMI PCOS (green) vs high BMI PCOS (blue); (e) low BMI PCOS (green) vs high BMI Controls (blue); (f) high BMI PCOS (green) vs low BMI Controls (blue)

supplementary Fig 3

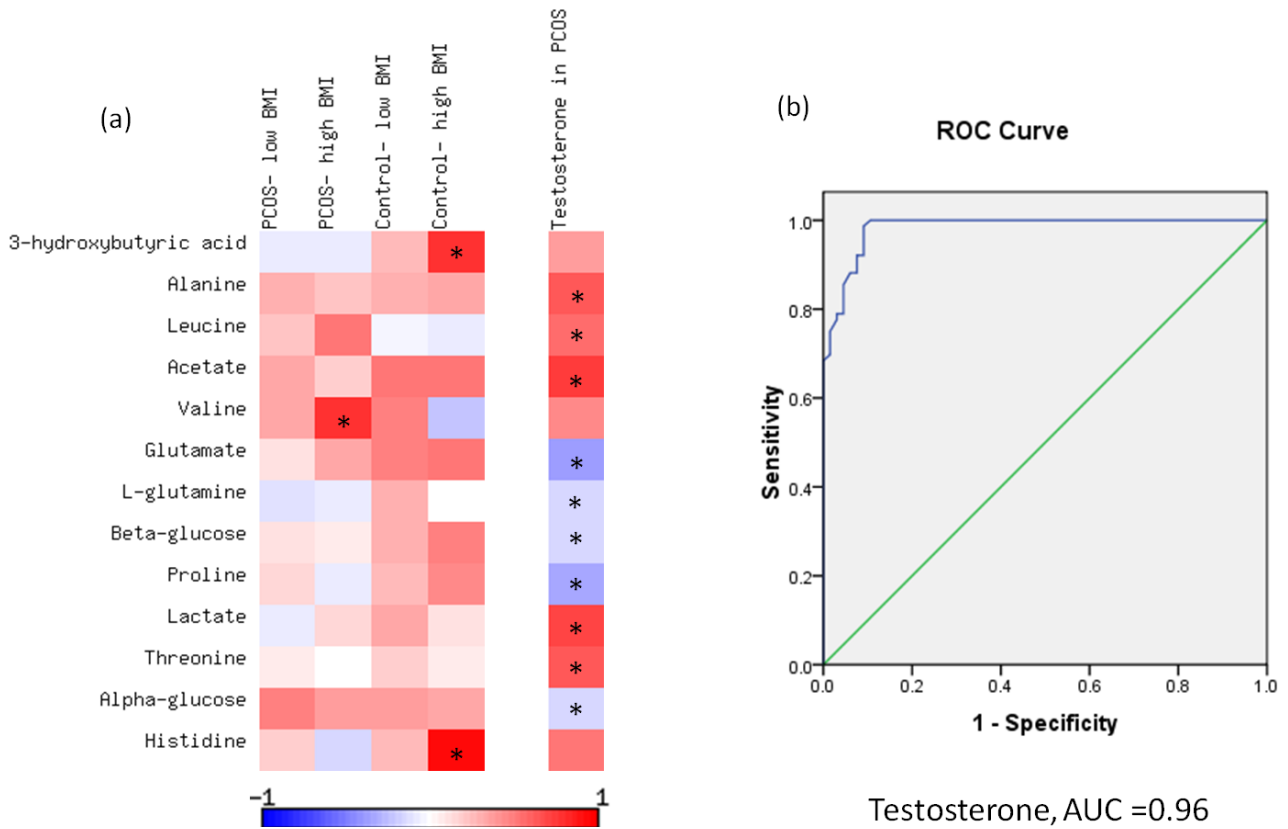

**Supplementary fig3:** (a) Correlation of identified major metabolites with BMI (low and high BMI subgroups from both the PCOS and control groups) and testosterone levels of PCOS patients are represented as a heatmap corresponding to a matrix of Pearson's correlations. Marked correlations are significant ( $p < 0.05$ ); (b) ROC curve for testosterone with AUC value of 0.96

supplementary Fig 4

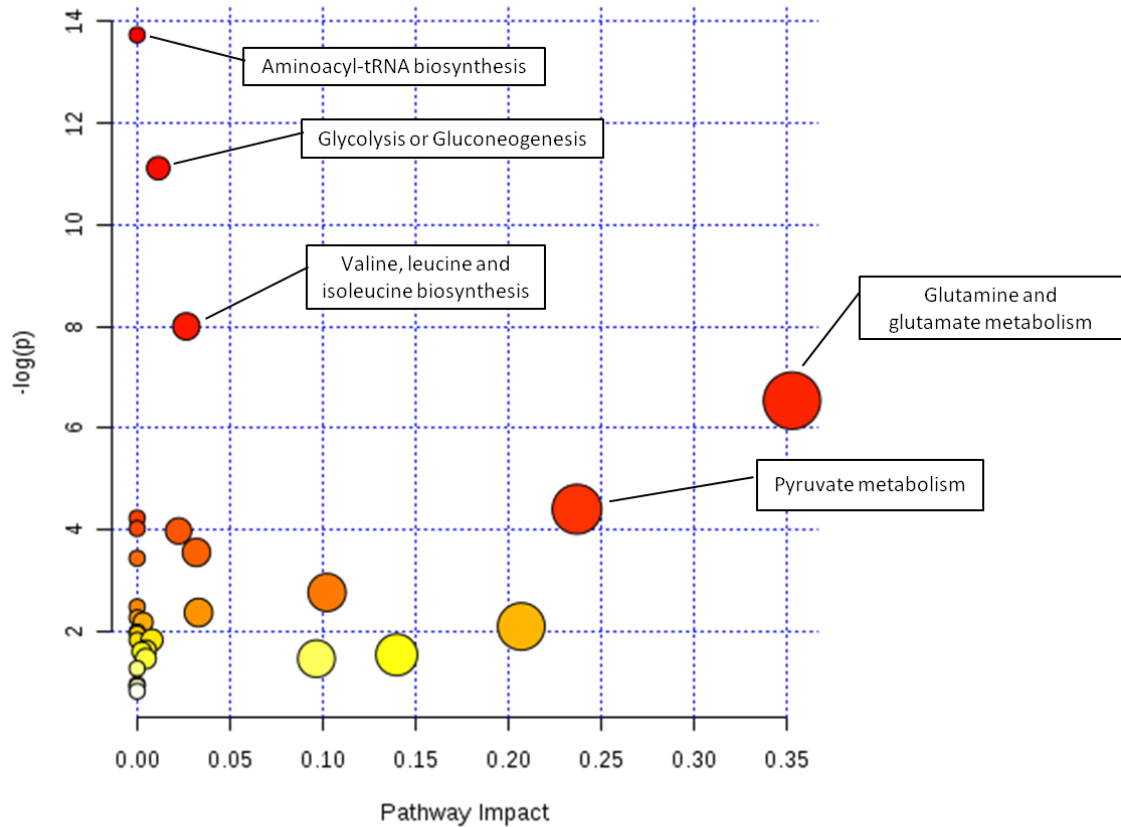

**Supplementary fig4:** Metabolic pathway analysis (MetPA) of PCOS patients. MetPA generated pathway impact score indicates the potential pathways altered in women with PCOS. MetPA calculates the pathway impact based on the matched metabolites normalized by importance measures of all metabolites in each pathway. Pathway impact represents the potentially altered metabolic pathways. The most impacted pathways with high significance score are highlighted. MetPA generated pathway indicates alterations in aminoacyl-tRNA biosynthesis, glycolysis/gluconeogenesis, valine/leucine/isoleucine biosynthesis, glutamine/glutamate metabolism and pyruvate metabolism

**Supplementary Table 1:** The pathway analysis shows potential pathways involved PCOS

|                                             | <b>Total</b> | <b>Expected</b> | <b>Hits</b> | <b>Raw p</b> | <b>Holm p</b> | <b>FDR</b> | <b>Impact</b> |
|---------------------------------------------|--------------|-----------------|-------------|--------------|---------------|------------|---------------|
| Aminoacyl-tRNA biosynthesis                 | 75.00        | 0.41            | 6.00        | 0.00         | 0.00          | 0.00       | 0.00          |
| Glycolysis or Gluconeogenesis               | 31.00        | 0.17            | 4.00        | 0.00         | 0.00          | 0.00       | 0.01          |
| Valine, leucine and isoleucine biosynthesis | 27.00        | 0.15            | 3.00        | 0.00         | 0.03          | 0.01       | 0.03          |
| D-Glutamine and D-glutamate metabolism      | 11.00        | 0.06            | 2.00        | 0.00         | 0.11          | 0.03       | 0.35          |
| Pyruvate metabolism                         | 32.00        | 0.17            | 2.00        | 0.01         | 0.93          | 0.19       | 0.24          |
| Propanoate metabolism                       | 35.00        | 0.19            | 2.00        | 0.01         | 1.00          | 0.19       | 0.00          |
| Nitrogen metabolism                         | 39.00        | 0.21            | 2.00        | 0.02         | 1.00          | 0.19       | 0.00          |
| Valine, leucine and isoleucine degradation  | 40.00        | 0.22            | 2.00        | 0.02         | 1.00          | 0.19       | 0.02          |
| Starch and sucrose metabolism               | 50.00        | 0.27            | 2.00        | 0.03         | 1.00          | 0.25       | 0.03          |
| Synthesis and degradation of ketone bodies  | 6.00         | 0.03            | 1.00        | 0.03         | 1.00          | 0.26       | 0.00          |
| Arginine and proline metabolism             | 77.00        | 0.42            | 2.00        | 0.06         | 1.00          | 0.46       | 0.10          |
| Cyanoamino acid metabolism                  | 16.00        | 0.09            | 1.00        | 0.08         | 1.00          | 0.56       | 0.00          |
| Sulfur metabolism                           | 18.00        | 0.10            | 1.00        | 0.09         | 1.00          | 0.57       | 0.03          |
| Taurine and hypotaurine metabolism          | 20.00        | 0.11            | 1.00        | 0.10         | 1.00          | 0.59       | 0.00          |
| Selenoamino acid metabolism                 | 22.00        | 0.12            | 1.00        | 0.11         | 1.00          | 0.60       | 0.00          |
| Alanine, aspartate and glutamate metabolism | 24.00        | 0.13            | 1.00        | 0.12         | 1.00          | 0.61       | 0.21          |
| Pantothenate and CoA biosynthesis           | 27.00        | 0.15            | 1.00        | 0.14         | 1.00          | 0.63       | 0.00          |
| beta-Alanine metabolism                     | 28.00        | 0.15            | 1.00        | 0.14         | 1.00          | 0.63       | 0.00          |
| Pentose phosphate pathway                   | 32.00        | 0.17            | 1.00        | 0.16         | 1.00          | 0.64       | 0.00          |
| Vitamin B6 metabolism                       | 32.00        | 0.17            | 1.00        | 0.16         | 1.00          | 0.64       | 0.01          |
| Butanoate metabolism                        | 40.00        | 0.22            | 1.00        | 0.20         | 1.00          | 0.73       | 0.00          |
| Galactose metabolism                        | 41.00        | 0.22            | 1.00        | 0.20         | 1.00          | 0.73       | 0.00          |
| Histidine metabolism                        | 44.00        | 0.24            | 1.00        | 0.21         | 1.00          | 0.74       | 0.14          |
| Fructose and mannose metabolism             | 48.00        | 0.26            | 1.00        | 0.23         | 1.00          | 0.74       | 0.00          |
| Glycine, serine and threonine metabolism    | 48.00        | 0.26            | 1.00        | 0.23         | 1.00          | 0.74       | 0.10          |
| Pyrimidine metabolism                       | 60.00        | 0.32            | 1.00        | 0.28         | 1.00          | 0.86       | 0.00          |
| Amino sugar and nucleotide sugar metabolism | 88.00        | 0.48            | 1.00        | 0.38         | 1.00          | 1.00       | 0.00          |
| Purine metabolism                           | 92.00        | 0.50            | 1.00        | 0.40         | 1.00          | 1.00       | 0.00          |
| Porphyrin and chlorophyll metabolism        | 104.00       | 0.56            | 1.00        | 0.44         | 1.00          | 1.00       | 0.00          |
